# Supplementary material
Source: publisher figshare collection journal article supplement (https://sage.figshare.com/ndownloader/files/13569326)
Supplement: Supplementary file 1 [file 13569326]

Table S1: Means for the dependent variable of nature connection (N=1000)

| Variable           | Level   | <i>n</i> | %    | <a href="#">2011 Brisbane SUA (%)</a> | Nature Connection |           |
|--------------------|---------|----------|------|---------------------------------------|-------------------|-----------|
|                    |         |          |      |                                       | <i>Mean</i>       | <i>SD</i> |
| <b>Gender</b>      | Male    | 475      | 47.5 | 49.3                                  | 3.31              | 0.676     |
|                    | Female  | 525      | 52.5 | 50.7                                  | 3.45              | 0.705     |
| <b>Age (years)</b> | 18-24   | 110      | 11   | ~9.5                                  | 3.29              | 0.640     |
|                    | 25-34   | 186      | 18.6 | 15                                    | 3.37              | 0.761     |
|                    | 35-44   | 196      | 19.6 | 14.8                                  | 3.31              | 0.672     |
|                    | 45-54   | 177      | 17.7 | 13.1                                  | 3.40              | 0.687     |
|                    | 55-64   | 156      | 15.6 | 10.7                                  | 3.48              | 0.636     |
|                    | Over 65 | 175      | 17.5 | 11.6                                  | 3.41              | 0.723     |

SUA = Significant Urban Area

Table S2: Survey questionnaire used to measure the variables under investigation in the study.

| Construct                       | Variable                                | Items                                                                                                                                                                                                                                                                                                                                                                                                                                                                                                                                                                                                                                                                                                                                                                                                                           |                       |                    |                                |           |                    |
|---------------------------------|-----------------------------------------|---------------------------------------------------------------------------------------------------------------------------------------------------------------------------------------------------------------------------------------------------------------------------------------------------------------------------------------------------------------------------------------------------------------------------------------------------------------------------------------------------------------------------------------------------------------------------------------------------------------------------------------------------------------------------------------------------------------------------------------------------------------------------------------------------------------------------------|-----------------------|--------------------|--------------------------------|-----------|--------------------|
| Urban Nature                    | Definition                              | All cities contain nature. Parks, street trees, riverside walkways, creeks, bushland reserves, sports fields and even home gardens are all part of what makes up nature in Brisbane. Urban nature includes all the plants and wildlife that live in the city. These next two sections contain questions about how you interact with urban nature.                                                                                                                                                                                                                                                                                                                                                                                                                                                                               |                       |                    |                                |           |                    |
| Nature connection               | Nature<br>Relatedness Six<br>Item Scale | <div><i>Instructions:</i> Please rate the extent to which you agree with each statement. Please click on the answer that indicates how you really feel, rather than how you think “most people” feel.</div> <table><tr><td>Strongly disagree (1)</td><td>Disagree (2)</td><td>Neither agree nor disagree (3)</td><td>Agree (4)</td><td>Strongly agree (5)</td></tr></table> <div><div>1. My ideal holiday spot would be a remote, wilderness area</div><div>2. I always think about how my actions affect the environment</div><div>3. My connection to nature and the environment is a part of my spirituality</div><div>4. I take notice of wildlife wherever I am</div><div>5. My relationship to nature is an important part of who I am</div><div>6. I feel very connected to all living things and the earth.</div></div> | Strongly disagree (1) | Disagree (2)       | Neither agree nor disagree (3) | Agree (4) | Strongly agree (5) |
| Strongly disagree (1)           | Disagree (2)                            | Neither agree nor disagree (3)                                                                                                                                                                                                                                                                                                                                                                                                                                                                                                                                                                                                                                                                                                                                                                                                  | Agree (4)             | Strongly agree (5) |                                |           |                    |
| Adult Nature<br>Experience Home | Access to a<br>private outdoor<br>area  | <div><i>Instructions:</i> Does your home have a private outdoor area (e.g. backyard, balcony, garden, veranda)?</div> <div><div>• Yes (2)</div><div>• No (1)</div></div>                                                                                                                                                                                                                                                                                                                                                                                                                                                                                                                                                                                                                                                        |                       |                    |                                |           |                    |

|                                 |                                          |                                                                                                                                                                                                                                                                                                                                                                                                                                                           |
|---------------------------------|------------------------------------------|-----------------------------------------------------------------------------------------------------------------------------------------------------------------------------------------------------------------------------------------------------------------------------------------------------------------------------------------------------------------------------------------------------------------------------------------------------------|
| Adult Nature<br>Experience Home | Duration of<br>nature contact at<br>home | <p><i>Instructions:</i> During a typical seven day week how much time would spend in this private outdoor area?</p> <ul style="list-style-type: none"> <li>• No time (1)</li> <li>• Less than 30 minutes a week (2)</li> <li>• 30 minutes to 4 hours a week (3)</li> <li>• Over 4 hours and less than 10 hours a week (4)</li> <li>• Over 10 hours and less 25 hours a week (5)</li> <li>• Over 25 hours a week (approx three hours a day) (6)</li> </ul> |
| Adult Nature<br>Experience Home | Level of<br>greenness at<br>home         | <p><i>Instructions:</i> What approximate percentage (%) of this private outdoor area is covered with plants?<br/>(e.g. grass, trees, shrubs, potted plants)</p> <ul style="list-style-type: none"> <li>• 0% (no plants) (1)</li> <li>• 1% to 20% (2)</li> <li>• 21% to 40% (3)</li> <li>• 41% to 60% (4)</li> <li>• 61% to 80% (5)</li> <li>• 81% to 100% (6)</li> </ul>                                                                                  |

|                                 |                                   |                                                                                                                                                                                                                                                                                                                                                                                                                                                                                                                                          |
|---------------------------------|-----------------------------------|------------------------------------------------------------------------------------------------------------------------------------------------------------------------------------------------------------------------------------------------------------------------------------------------------------------------------------------------------------------------------------------------------------------------------------------------------------------------------------------------------------------------------------------|
| Adult Nature<br>Experience Home | Home views                        | <p><i>Instructions:</i> Are the views from your home mainly:</p> <ul style="list-style-type: none"> <li>• Very urban (1)</li> <li>• Urban (2)</li> <li>• Mix of urban and natural (3)</li> <li>• Natural (4)</li> <li>• Very natural (5)</li> </ul>                                                                                                                                                                                                                                                                                      |
| Adult Nature<br>Experience Home | Satisfaction of<br>nature at home | <p><i>Instructions:</i> How satisfied are you with the nature (e.g. trees, parks, vegetation) around your home (i.e. within 20 meters of your home)?</p> <ul style="list-style-type: none"> <li>• Extremely satisfied (7)</li> <li>• Moderately satisfied (6)</li> <li>• Slightly satisfied (5)</li> <li>• Neither satisfied nor dissatisfied (4)</li> <li>• Slightly dissatisfied (3)</li> <li>• Moderately dissatisfied (2)</li> <li>• Extremely dissatisfied (1)</li> <li>• There is no nature within 20 m of my home (99)</li> </ul> |

|                                 |                                              |                                                                                                                                                                                                                                                                                                                                                                                                                                                                                  |
|---------------------------------|----------------------------------------------|----------------------------------------------------------------------------------------------------------------------------------------------------------------------------------------------------------------------------------------------------------------------------------------------------------------------------------------------------------------------------------------------------------------------------------------------------------------------------------|
| Adult Nature<br>Experience City | Duration of<br>nature contact in<br>the city | <i>Instructions:</i> During a typical seven day week, how much do you come into contact with nature? <ul style="list-style-type: none"> <li>• No time (1)</li> <li>• Less than 30 minutes a week (2)</li> <li>• Over 30 minutes and less than 4 hours a week (3)</li> <li>• Over 4 hours and less than 10 hours a week (4)</li> <li>• Over 10 hours and less than 25 hours a week (5)</li> <li>• Over 25 hours a week (approx three hours a day) (6)</li> </ul>                  |
| Adult Nature<br>Experience City | Satisfaction of<br>nature in the city        | <i>Instructions:</i> How satisfied are you with the nature (e.g. trees, parks, vegetation) in your suburb? <ul style="list-style-type: none"> <li>• Extremely satisfied (7)</li> <li>• Moderately satisfied (6)</li> <li>• Slightly satisfied (5)</li> <li>• Neither satisfied nor dissatisfied (4)</li> <li>• Slightly dissatisfied (3)</li> <li>• Moderately dissatisfied (2)</li> <li>• Extremely dissatisfied (1)</li> <li>• There is no nature in my suburb (99)</li> </ul> |

|                                         |                      |                                                                                                                                                                                                                                                                                                                                                                                                                                                                                                       |
|-----------------------------------------|----------------------|-------------------------------------------------------------------------------------------------------------------------------------------------------------------------------------------------------------------------------------------------------------------------------------------------------------------------------------------------------------------------------------------------------------------------------------------------------------------------------------------------------|
| <p>Adult Nature<br/>Experience City</p> | <p>Accessibility</p> | <p><i>Instructions:</i> In your opinion, how easy or difficult is it to come into contact with the nature in your suburb?</p> <ul style="list-style-type: none"> <li>• Extremely easy (8)</li> <li>• Moderately easy (7)</li> <li>• Slightly easy (6)</li> <li>• Neither easy nor difficult (5)</li> <li>• Slightly difficult (4)</li> <li>• Moderately difficult (3)</li> <li>• Extremely difficult (2)</li> <li>• It is not possible (1)</li> <li>• There is no nature in my suburb (99)</li> </ul> |
|-----------------------------------------|----------------------|-------------------------------------------------------------------------------------------------------------------------------------------------------------------------------------------------------------------------------------------------------------------------------------------------------------------------------------------------------------------------------------------------------------------------------------------------------------------------------------------------------|

|                                          |                                       |                                                                                                                                                                                                                                                                                                                                                                                                                                                                                                                                                                                                                                                                                                                                                                                                                                                                                                                                                                                                                                                                                                                                                                                                                                                                                                   |          |               |  |  |                 |            |                             |          |               |
|------------------------------------------|---------------------------------------|---------------------------------------------------------------------------------------------------------------------------------------------------------------------------------------------------------------------------------------------------------------------------------------------------------------------------------------------------------------------------------------------------------------------------------------------------------------------------------------------------------------------------------------------------------------------------------------------------------------------------------------------------------------------------------------------------------------------------------------------------------------------------------------------------------------------------------------------------------------------------------------------------------------------------------------------------------------------------------------------------------------------------------------------------------------------------------------------------------------------------------------------------------------------------------------------------------------------------------------------------------------------------------------------------|----------|---------------|--|--|-----------------|------------|-----------------------------|----------|---------------|
| Adult Nature Experience<br>Activity Type | Activity type during nature contact   | <p><i>Instructions:</i> Thinking about the amount of time you come into contact with nature, as answered above, please rank up to three main purposes for the majority of this time spent in contact with nature?</p> <ul style="list-style-type: none"> <li>• Work - spending time in nature is part of my working day</li> <li>• Transport - travel through nature to get from one destination to another</li> <li>• Health and fitness - spending time in nature to exercise/play sports and look after my physical health</li> <li>• Rest and relaxation - spending time in nature to 'switch off' and escape daily pressures</li> <li>• Social interaction - spending time in nature to meet with other people (e.g. family, friends, teammates)</li> <li>• Chores - spending time in nature as part of domestic responsibilities</li> <li>• Education - spending time in nature for educational purposes</li> <li>• Spiritual/Culture - spending time in nature is part of my spirituality and/or culture</li> <li>• Animal interactions - spending time in nature to walk dogs, ride horses, feed ducks etc</li> <li>• Hobbies - spending time in nature to carry out activities I find fun and/or interesting (e.g. gardening, art, craft, photography, golf)</li> <li>• Other</li> </ul> |          |               |  |  |                 |            |                             |          |               |
| Childhood Nature Experience              | Early Environment<br>Experience Scale | <p><i>Instructions:</i> Thinking back to when you were growing up, how true for you are each of following statements:</p> <table border="1" data-bbox="734 1273 2033 1331"> <tr> <td data-bbox="734 1273 994 1331">Very untrue (1)</td> <td data-bbox="994 1273 1176 1331">Untrue (2)</td> <td data-bbox="1176 1273 1576 1331">Neither true nor untrue (3)</td> <td data-bbox="1576 1273 1798 1331">True (4)</td> <td data-bbox="1798 1273 2033 1331">Very true (5)</td> </tr> </table>                                                                                                                                                                                                                                                                                                                                                                                                                                                                                                                                                                                                                                                                                                                                                                                                           |          |               |  |  | Very untrue (1) | Untrue (2) | Neither true nor untrue (3) | True (4) | Very true (5) |
| Very untrue (1)                          | Untrue (2)                            | Neither true nor untrue (3)                                                                                                                                                                                                                                                                                                                                                                                                                                                                                                                                                                                                                                                                                                                                                                                                                                                                                                                                                                                                                                                                                                                                                                                                                                                                       | True (4) | Very true (5) |  |  |                 |            |                             |          |               |

|                                |                           |                                                                                                                                                                                                                                                                                                                                                                                                                                                                                     |
|--------------------------------|---------------------------|-------------------------------------------------------------------------------------------------------------------------------------------------------------------------------------------------------------------------------------------------------------------------------------------------------------------------------------------------------------------------------------------------------------------------------------------------------------------------------------|
|                                |                           | <ol style="list-style-type: none"> <li>1. When I was younger my parents were interested in nature and the outdoors (e.g. going on camping trips, gardening, bush walks, beach trips)</li> <li>2. I remember playing outdoors (e.g. at the beach or creeks, in the bush, fields or forests) while I was growing up</li> <li>3. I had access to a garden when I was young</li> <li>4. My early school(s) had green play areas</li> </ol>                                              |
| Childhood Nature Experience    | Home setting of childhood | <p><i>Instructions:</i> Thinking back to when you were growing up, do you consider that you grew up in an area that was:</p> <ul style="list-style-type: none"> <li>• mostly surrounded by a high density of buildings (e.g. large cities, city centre)</li> <li>• mostly surrounded by medium to low density of buildings (e.g. smaller towns, city suburbs)</li> <li>• mostly surrounded by nature areas (farmlands, forests, mountains, bush, undeveloped coastlines)</li> </ul> |
| Control Variable: Demographics | Age                       | <i>Instructions:</i> In what year were you born? (drop down list of years 1900 – 2010)                                                                                                                                                                                                                                                                                                                                                                                              |
| Control Variable: Demographics | Gender                    | <p>Gender: I identify as</p> <ul style="list-style-type: none"> <li>• Male (2), Female (1), Other (3)</li> </ul>                                                                                                                                                                                                                                                                                                                                                                    |
| Control Variable: Demographics | Financial security        | <p><i>Instructions:</i> How financially secure do you feel?</p> <ul style="list-style-type: none"> <li>• I feel very financially secure (5)</li> <li>• I feel financially secure (4)</li> <li>• I feel neither financially secure nor insecure (3)</li> <li>• I do not feel financially secure (2)</li> <li>• I really do not feel financially secure (1)</li> </ul>                                                                                                                |



|                               |                         |                                                                                                                                                                                                                                                           |
|-------------------------------|-------------------------|-----------------------------------------------------------------------------------------------------------------------------------------------------------------------------------------------------------------------------------------------------------|
| Control Variable:<br>Religion | Annual<br>participation | <i>Instructions:</i> During the last 12 months have you, at least once a week for most weeks, attended a religious service/event at a place of worship (e.g. church, mosque, temple). <ul style="list-style-type: none"> <li>• 0 = No, 1 = Yes</li> </ul> |
|-------------------------------|-------------------------|-----------------------------------------------------------------------------------------------------------------------------------------------------------------------------------------------------------------------------------------------------------|
